# Supplementary material
Source: Springer Nature journal article supplement (https://www.springermedizin.de/resource/supplementary/12879_2013_3137_MOESM3_ESM.pdf/9446064)

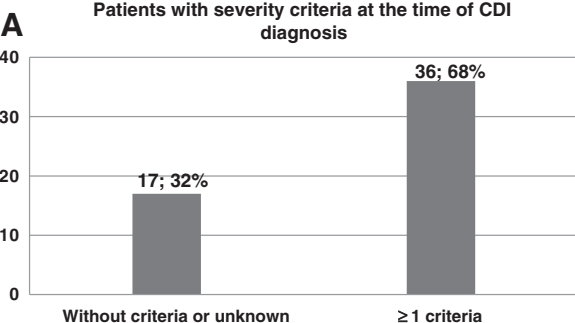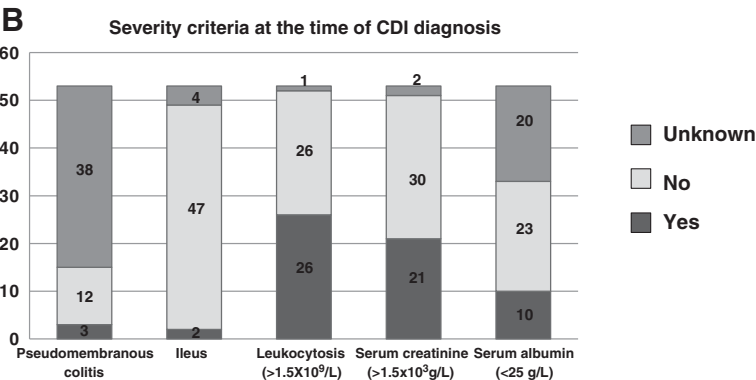

Supplement: MOESM3 [file 9446064]
